# Supplementary material for: Targeted exome sequencing of unselected heavy‐ion beam‐irradiated populations reveals less‐biased mutation characteristics in the rice genome
Source: PubMed Central journal article supplement (PMC6850588; doi:10.1111/tpj.14213), 2019-02-25
Supplement: TPJ-98-301-s002.pdf [file TPJ-98-301-s002.pdf]

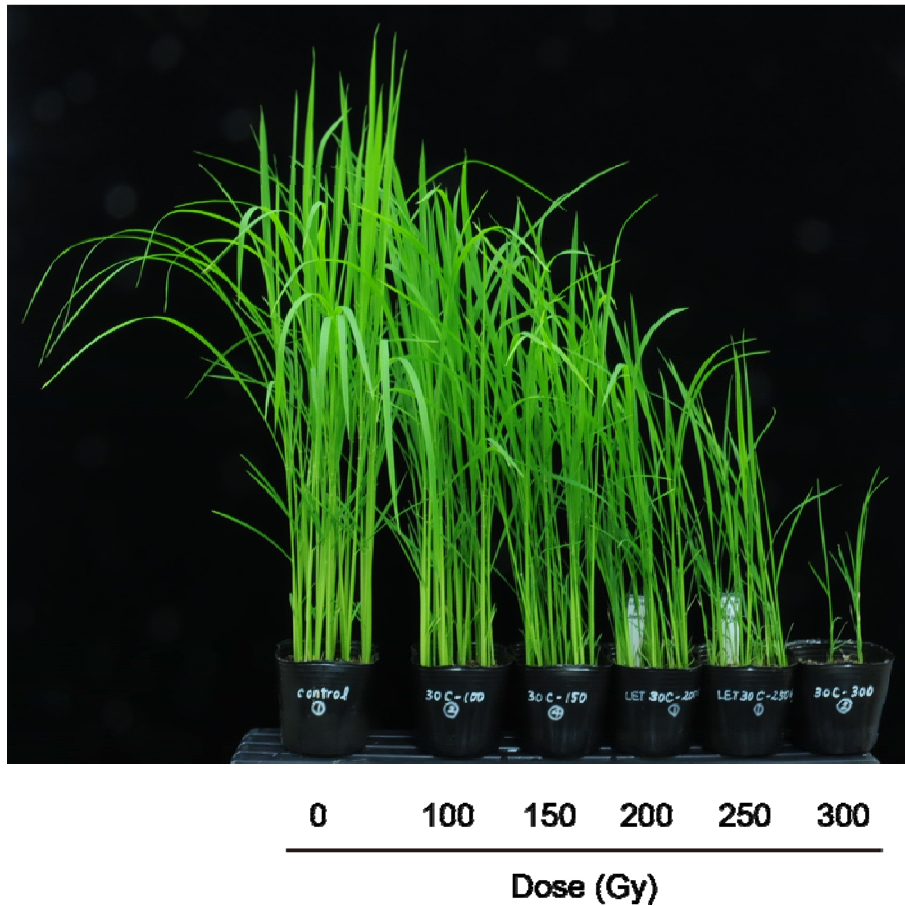

**Figure S2. Determination of survival rate at different irradiation doses.**

The survival rate, defined as the percentage of plants that showed normal phyllotaxis and leaf numbers, was determined in a greenhouse 4 weeks after sowing. The assay was conducted in triplicate with 100 seeds in each replicate, and a representative result is shown.
