# Supplementary material for: Targeted exome sequencing of unselected heavy‐ion beam‐irradiated populations reveals less‐biased mutation characteristics in the rice genome
Source: PubMed Central journal article supplement (PMC6850588; doi:10.1111/tpj.14213), 2019-02-25
Supplement: TPJ-98-301-s003.pdf [file TPJ-98-301-s003.pdf]

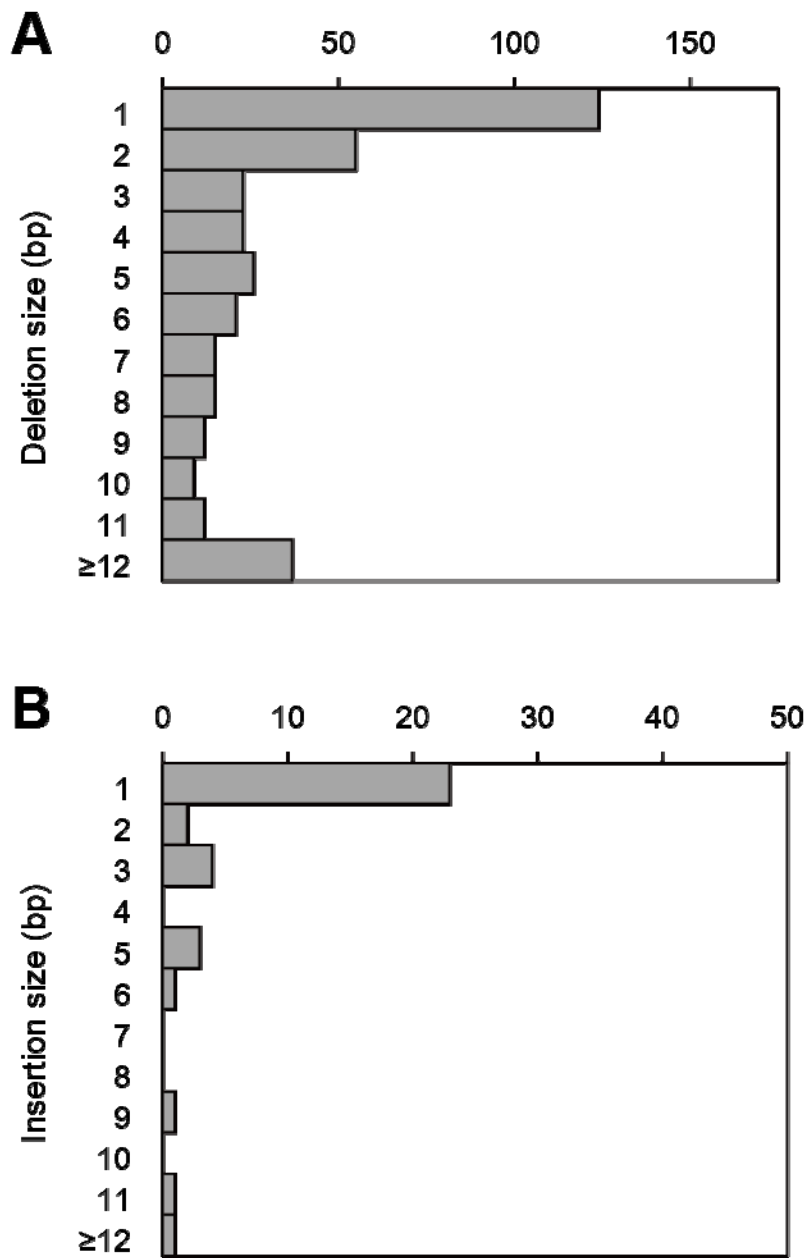

**Figure S3. Size distribution of deletions and insertions in an unselected carbon-ion beam-irradiated rice population**

The size distribution of deletions (A) and insertions (B) observed in 110 independent sequenced  $M_2$  lines derived from 150 Gy irradiation of dry seeds. The majority of the detected insertion/deletion mutations involved a single nucleotide or several nucleotides. The frequency of insertions was approximately 10 times lower than that of deletions.
