# Supplementary material for: Targeted exome sequencing of unselected heavy‐ion beam‐irradiated populations reveals less‐biased mutation characteristics in the rice genome
Source: PubMed Central journal article supplement (PMC6850588; doi:10.1111/tpj.14213), 2019-02-25
Supplement: TPJ-98-301-s004.pdf [file TPJ-98-301-s004.pdf]

Table S1. Sequencing statistics for individually captured carbon- and neon-ion beam-induced mutants (ordered by LET)

| Line                                | 6-99                       | 5-24                       | 13-45                      | 3-14                       | 3-51                       | 5-12                       |
|-------------------------------------|----------------------------|----------------------------|----------------------------|----------------------------|----------------------------|----------------------------|
| Background                          | Nipponbare                 | Nipponbare                 | Nipponbare                 | Nipponbare                 | Nipponbare                 | Nipponbare                 |
| Irradiation condition <sup>*1</sup> | Carbon, 40 Gy<br>23 keV/μm | Carbon, 20 Gy<br>30 keV/μm | Carbon, 20 Gy<br>30 keV/μm | Carbon, 15 Gy<br>50 keV/μm | Carbon, 15 Gy<br>50 keV/μm | Carbon, 15 Gy<br>50 keV/μm |
| Phenotype                           | Salt tolerance             | Late maturing              | Ripening failure           | Ripening failure           | Dwarf                      | Stripe                     |
| Blocking DNA <sup>*2</sup>          | SeqCap                     | SeqCap                     | SeqCap                     | Custom                     | SeqCap                     | Custom                     |
| Total read bases                    | 9,982,229,800              | 7,354,545,000              | 6,481,829,200              | 5,637,744,900              | 6,289,462,100              | 6,270,056,100              |
| Fold target                         | 293.25                     | 216.05                     | 190.41                     | 165.62                     | 184.76                     | 184.19                     |
| Total reads aligned                 | 99,795,562                 | 73,318,867                 | 64,728,733                 | 56,166,726                 | 62,151,510                 | 62,486,773                 |
| Reads aligned (%)                   | 99.97                      | 99.69                      | 99.86                      | 99.63                      | 98.82                      | 99.66                      |
| Total bases aligned                 | 9,967,154,660              | 7,298,079,473              | 6,460,553,606              | 5,599,303,871              | 6,141,965,753              | 6,223,463,364              |
| On bait bases                       | 7,510,416,096              | 4,846,015,250              | 4,893,906,840              | 3,454,164,026              | 3,681,465,976              | 4,067,529,539              |
| Near bait bases                     | 1,204,980,454              | 1,381,281,118              | 813,161,469                | 1,084,555,821              | 1,260,015,538              | 1,256,653,845              |
| % on/near bait                      | 87.44                      | 85.33                      | 88.34                      | 81.06                      | 80.45                      | 85.55                      |
| Mean target coverage                | 127.74                     | 96.53                      | 86.73                      | 71.57                      | 69.15                      | 80.32                      |
| % target read > 1x                  | 97.36                      | 95.27                      | 96.05                      | 96.71                      | 94.52                      | 94.34                      |
| % target read > 10x                 | 88.77                      | 84.74                      | 88.73                      | 86.76                      | 82.07                      | 82.06                      |
| % target read > 20x                 | 84.65                      | 79.68                      | 84.20                      | 80.53                      | 75.17                      | 76.09                      |
| % target read > 30x                 | 80.26                      | 75.73                      | 78.98                      | 74.83                      | 69.82                      | 71.44                      |
| % target read > 50x                 | 72.17                      | 68.08                      | 68.38                      | 61.45                      | 59.51                      | 62.61                      |

Table S1. (continued)

| Line                        | 4-13                             | 18-36                            | 6-62                           | 7-3B                           | Ne-1779                        | 7-30                           | 14-45                            |
|-----------------------------|----------------------------------|----------------------------------|--------------------------------|--------------------------------|--------------------------------|--------------------------------|----------------------------------|
| Background                  | Nipponbare                       | Nipponbare                       | Nipponbare                     | Nipponbare                     | Nipponbare                     | Nipponbare                     | Unknown<br>(outcrossed)          |
| Irradiation condition<br>*1 | Carbon, 15 Gy<br>60 keV/ $\mu$ m | Carbon, 15 Gy<br>60 keV/ $\mu$ m | Neon, 15 Gy<br>63 keV/ $\mu$ m | Neon, 10 Gy<br>63 keV/ $\mu$ m | Neon, 15 Gy<br>63 keV/ $\mu$ m | Neon, 15 Gy<br>70 keV/ $\mu$ m | Carbon, 20 Gy<br>40 keV/ $\mu$ m |
| Phenotype                   | Weak growth                      | Salt tolerance                   | Dwarf                          | Lesion mimic                   | Virescent                      | Pale green                     | Salt tolerant                    |
| Blocking DNA *2             | Custom                           | SeqCap                           | Custom                         | Custom                         | SeqCap                         | Custom                         | Custom                           |
| Total read bases            | 7,195,028,700                    | 9,556,373,300                    | 5,955,444,100                  | 6,077,810,500                  | 6,345,199,400                  | 7,275,933,700                  | 9,665,989,800                    |
| Fold target                 | 211.37                           | 280.73                           | 174.95                         | 178.55                         | 186.40                         | 213.74                         | 283.96                           |
| Total reads aligned         | 71,689,912                       | 95,537,610                       | 58,932,688                     | 60,467,123                     | 63,319,725                     | 72,543,245                     | 96,618,923                       |
| Reads aligned (%)           | 99.64                            | 99.97                            | 98.96                          | 99.49                          | 99.79                          | 99.70                          | 99.96                            |
| Total bases aligned         | 7,133,685,392                    | 9,541,675,913                    | 5,868,415,678                  | 6,026,315,570                  | 6,309,259,147                  | 7,227,951,637                  | 9,644,842,979                    |
| On bait bases               | 4,709,328,265                    | 7,165,993,106                    | 3,509,300,891                  | 3,766,988,660                  | 4,615,720,506                  | 4,434,909,206                  | 7,226,624,327                    |
| Near bait bases             | 1,340,676,976                    | 1,152,232,803                    | 1,094,982,673                  | 1,167,510,170                  | 998,009,006                    | 1,345,236,775                  | 1,131,073,073                    |
| % on/near bait              | 84.81                            | 87.18                            | 78.46                          | 81.88                          | 88.98                          | 79.97                          | 86.65                            |
| Mean target<br>coverage     | 94.87                            | 121.15                           | 73.83                          | 79.42                          | 91.33                          | 94.10                          | 121.52                           |
| % target read > 1x          | 95.69                            | 97.32                            | 97.60                          | 96.88                          | 91.44                          | 97.74                          | 97.28                            |
| % target read > 10x         | 85.08                            | 88.37                            | 88.82                          | 88.10                          | 79.21                          | 89.79                          | 88.23                            |
| % target read > 20x         | 79.91                            | 83.57                            | 82.81                          | 82.65                          | 74.34                          | 84.77                          | 83.78                            |
| % target read > 30x         | 75.77                            | 78.67                            | 77.03                          | 77.58                          | 70.55                          | 80.34                          | 79.13                            |
| % target read > 50x         | 67.56                            | 70.17                            | 62.83                          | 65.54                          | 63.48                          | 70.39                          | 70.75                            |

\*1 Ion (carbon or neon), dose (Gy) and linear energy transfer (keV/ $\mu$ m)

\*2 Custom: custom rice repetitive element (Cot-1) library; SeqCap: SeqCap EZ developer reagent
