# Supplementary material for: Targeted exome sequencing of unselected heavy‐ion beam‐irradiated populations reveals less‐biased mutation characteristics in the rice genome
Source: PubMed Central journal article supplement (PMC6850588; doi:10.1111/tpj.14213), 2019-02-25
Supplement: TPJ-98-301-s006.pdf [file TPJ-98-301-s006.pdf]

Table S3. Covered bases (“Covered”), average read depth (“Average depth”), and the fraction of covered bases against the target region (“Frac.”) in the 6-62 mutant and the average of three mutants (3-14, 7-30, and 7-3B)

| Chr. | Location  |           | 6-62 mutant |               |       | Average of 3 other mutants<br>(3-14, 7-30, 7-3B) |               |       |
|------|-----------|-----------|-------------|---------------|-------|--------------------------------------------------|---------------|-------|
|      | Start     | End       | Covered     | Average depth | Frac. | Covered                                          | Average depth | Frac. |
| 9    | 3,063,815 | 3,064,438 | 0           | 0             | 0     | 624                                              | 36.4          | 1     |
| 9    | 3,074,231 | 3,074,518 | 0           | 0             | 0     | 288                                              | 66.7          | 1     |
| 9    | 3,075,476 | 3,075,524 | 0           | 0             | 0     | 49                                               | 68.2          | 1     |
| 9    | 3,075,624 | 3,075,829 | 0           | 0             | 0     | 206                                              | 104.2         | 1     |
| 9    | 3,077,552 | 3,077,720 | 0           | 0             | 0     | 169                                              | 80.0          | 1     |
| 9    | 3,077,930 | 3,077,995 | 0           | 0             | 0     | 66                                               | 48.1          | 1     |
| 9    | 3,078,118 | 3,078,225 | 0           | 0             | 0     | 108                                              | 57.7          | 1     |
| 9    | 3,079,315 | 3,079,422 | 0           | 0             | 0     | 108                                              | 98.4          | 1     |
| 9    | 3,079,501 | 3,079,566 | 0           | 0             | 0     | 66                                               | 101.3         | 1     |
| 9    | 3,083,592 | 3,083,652 | 0           | 0             | 0     | 61                                               | 77.7          | 1     |
| 9    | 3,083,780 | 3,083,907 | 0           | 0             | 0     | 128                                              | 132.5         | 1     |
| 9    | 3,084,904 | 3,084,945 | 0           | 0             | 0     | 42                                               | 73.7          | 1     |
| 9    | 3,085,262 | 3,085,378 | 0           | 0             | 0     | 117                                              | 124.0         | 1     |
| 9    | 3,085,468 | 3,085,519 | 0           | 0             | 0     | 52                                               | 97.8          | 1     |
| 9    | 3,091,500 | 3,091,681 | 0           | 0             | 0     | 182                                              | 69.8          | 1     |
| 9    | 3,091,781 | 3,091,866 | 0           | 0             | 0     | 86                                               | 81.9          | 1     |
| 9    | 3,092,019 | 3,092,095 | 0           | 0             | 0     | 77                                               | 98.8          | 1     |
| 9    | 3,092,192 | 3,092,503 | 0           | 0             | 0     | 312                                              | 91.8          | 1     |
| 9    | 3,105,019 | 3,105,495 | 0           | 0             | 0     | 477                                              | 61.0          | 1     |
| 9    | 3,120,346 | 3,121,350 | 0           | 0             | 0     | 1005                                             | 157.3         | 1     |
| 9    | 3,120,435 | 3,120,887 | 0           | 0             | 0     | 453                                              | 180.8         | 1     |
| 9    | 3,121,449 | 3,121,625 | 0           | 0             | 0     | 177                                              | 122.4         | 1     |
| 9    | 3,121,723 | 3,121,836 | 0           | 0             | 0     | 114                                              | 112.1         | 1     |
| 9    | 3,122,802 | 3,122,906 | 0           | 0             | 0     | 105                                              | 198.5         | 1     |
| 9    | 3,123,118 | 3,123,252 | 0           | 0             | 0     | 135                                              | 82.4          | 1     |
| 9    | 3,123,336 | 3,123,391 | 0           | 0             | 0     | 56                                               | 60.9          | 1     |
| 9    | 3,123,703 | 3,123,819 | 0           | 0             | 0     | 117                                              | 105.3         | 1     |
| 9    | 3,124,103 | 3,124,233 | 0           | 0             | 0     | 131                                              | 63.8          | 1     |
| 9    | 3,124,352 | 3,124,915 | 0           | 0             | 0     | 564                                              | 79.4          | 1     |
| 9    | 3,126,807 | 3,127,160 | 0           | 0             | 0     | 354                                              | 51.1          | 1     |
