# Supplementary material for: Targeted exome sequencing of unselected heavy‐ion beam‐irradiated populations reveals less‐biased mutation characteristics in the rice genome
Source: PubMed Central journal article supplement (PMC6850588; doi:10.1111/tpj.14213), 2019-02-25
Supplement: TPJ-98-301-s007.pdf [file TPJ-98-301-s007.pdf]

Table S4. Sequencing statistics for eight mutants for pre-multiplexed target enrichment

| Line                 | 5-24          | 7-3B          | D14-03        | D14-13        | D14-15        | D14-27        | D14-39        | D14-48        |
|----------------------|---------------|---------------|---------------|---------------|---------------|---------------|---------------|---------------|
| Total read bases     | 6,175,695,800 | 6,265,268,000 | 6,595,272,300 | 5,778,349,800 | 6,110,537,900 | 6,494,204,700 | 6,769,304,200 | 5,921,027,700 |
| Fold target          | 181.42        | 184.05        | 193.75        | 169.75        | 179.51        | 190.78        | 198.86        | 173.94        |
| Total reads aligned  | 61,381,532    | 62,315,604    | 65,531,678    | 57,459,155    | 60,708,668    | 64,602,576    | 67,242,840    | 58,925,509    |
| % aligned            | 99.39         | 99.46         | 99.36         | 99.44         | 99.35         | 99.48         | 99.33         | 99.52         |
| Total bases aligned  | 6,096,723,407 | 6,193,535,506 | 6,506,873,176 | 5,708,159,354 | 6,027,282,394 | 6,423,477,398 | 6,676,148,738 | 5,858,349,385 |
| On bait bases        | 3,264,345,883 | 3,338,414,084 | 3,404,027,532 | 3,054,289,596 | 3,192,231,463 | 3,481,575,513 | 3,494,483,661 | 3,179,299,216 |
| Near bait bases      | 1,654,123,768 | 1,626,706,071 | 1,767,551,356 | 1,506,133,829 | 1,656,127,727 | 1,667,584,908 | 1,838,909,132 | 1,452,697,759 |
| % on/near bait       | 80.67         | 80.17         | 79.48         | 79.89         | 80.44         | 80.16         | 79.89         | 79.07         |
| Mean target coverage | 63.21         | 64.71         | 65.81         | 59.32         | 61.56         | 67.57         | 67.54         | 61.92         |
| % target read > 1x   | 88.52         | 87.64         | 86.98         | 87.89         | 85.85         | 87.15         | 88.17         | 89.82         |
| % target read > 10x  | 63.31         | 61.82         | 61.68         | 64.36         | 61.01         | 61.17         | 61.40         | 63.82         |
| % target read > 20x  | 58.91         | 57.85         | 57.76         | 59.68         | 57.12         | 57.43         | 57.54         | 59.20         |
| % target read > 30x  | 56.25         | 55.51         | 55.40         | 56.73         | 54.74         | 55.21         | 55.25         | 56.43         |
| % target read > 50x  | 52.04         | 51.79         | 51.71         | 51.81         | 50.89         | 51.77         | 51.76         | 52.04         |
