# Supplementary material for: Targeted exome sequencing of unselected heavy‐ion beam‐irradiated populations reveals less‐biased mutation characteristics in the rice genome
Source: PubMed Central journal article supplement (PMC6850588; doi:10.1111/tpj.14213), 2019-02-25
Supplement: TPJ-98-301-s008.pdf [file TPJ-98-301-s008.pdf]

Table S5. Survival and mutation frequencies in the M<sub>2</sub> generation after irradiation of carbon-ion beam (LET: 23–30 keV/μm) to dry seeds

| Dose (Gy)                                                                                                           | Survival rate (%) | Infertility rate (%) | Mutation rate (%) |
|---------------------------------------------------------------------------------------------------------------------|-------------------|----------------------|-------------------|
| Experiment 1. An approximate tendency of the infertility rate and mutation frequencies in the field (FY2012; n=100) |                   |                      |                   |
| 0                                                                                                                   | 98.0              | 0.0                  | 0.0               |
| 75                                                                                                                  | 96.0              | 0.0                  | 4.2               |
| 100                                                                                                                 | 98.0              | 1.0                  | 3.1               |
| 125                                                                                                                 | 98.0              | 5.1                  | 8.7               |
| 150                                                                                                                 | 95.0              | 16.9                 | 11.6              |
| 175                                                                                                                 | 98.0              | 20.1                 | 14.3              |
| 200                                                                                                                 | 96.5              | 24.3                 | 8.8               |
| Experiment 2. Field confirmation of the infertility rate and mutation frequencies in different year (FY2015; n=300) |                   |                      |                   |
| 0                                                                                                                   | 90.0              | 0.0                  | 0.0               |
| 150                                                                                                                 | 82.5              | 13.1                 | 10.6              |
| 175                                                                                                                 | 79.5              | 23.2                 | 14.6              |

In each experiment, the data was an average of two independent experiments in the field. Survival rate, which is the percentage of the M<sub>1</sub> lines grown from the irradiated seeds in a paddy field, was comparable to that of the non-irradiated Nipponbare control up to 200 Gy in the first year (FY2012). In the second year (FY2015), the survival rates were entirely low due to the inadequate weather conditions during the season.
