# Supplementary material for: Targeted exome sequencing of unselected heavy‐ion beam‐irradiated populations reveals less‐biased mutation characteristics in the rice genome
Source: PubMed Central journal article supplement (PMC6850588; doi:10.1111/tpj.14213), 2019-02-25
Supplement: TPJ-98-301-s009.pdf [file TPJ-98-301-s009.pdf]

Table S6. Chromosomal distribution of mutations in M<sub>2</sub> progenies following 150 Gy irradiation of dry seeds

| Chromosome        | Chromosome length | Num. of mutations detected | Per Mb chromosome ( $\times 10^{-2}$ per line) | Total target length | Per Mb target (per line) |
|-------------------|-------------------|----------------------------|------------------------------------------------|---------------------|--------------------------|
| Chromosome 1      | 43,270,923        | 127                        | 2.10                                           | 10,592,691          | 0.86                     |
| Chromosome 2      | 35,937,250        | 127                        | 2.52                                           | 8,504,663           | 1.07                     |
| Chromosome 3      | 36,413,819        | 109                        | 2.14                                           | 9,313,635           | 0.84                     |
| Chromosome 4      | 35,502,694        | 74                         | 1.49                                           | 6,589,053           | 0.80                     |
| Chromosome 5      | 29,958,434        | 96                         | 2.29                                           | 5,986,230           | 1.15                     |
| Chromosome 6      | 31,248,787        | 76                         | 1.74                                           | 5,980,479           | 0.91                     |
| Chromosome 7      | 29,697,621        | 62                         | 1.49                                           | 5,734,166           | 0.77                     |
| Chromosome 8      | 28,443,022        | 63                         | 1.58                                           | 4,971,723           | 0.91                     |
| Chromosome 9      | 23,012,720        | 52                         | 1.61                                           | 4,013,198           | 0.93                     |
| Chromosome 10     | 23,207,287        | 64                         | 1.97                                           | 3,876,605           | 1.18                     |
| Chromosome 11     | 29,021,106        | 78                         | 1.92                                           | 4,657,012           | 1.20                     |
| Chromosome 12     | 27,531,856        | 69                         | 1.79                                           | 4,261,278           | 1.16                     |
| Average $\pm$ SD* |                   |                            | 1.89 $\pm$ 0.33                                |                     | 0.98 $\pm$ 0.16          |

\* Standard deviation
