# Supplementary material for: Targeted exome sequencing of unselected heavy‐ion beam‐irradiated populations reveals less‐biased mutation characteristics in the rice genome
Source: PubMed Central journal article supplement (PMC6850588; doi:10.1111/tpj.14213), 2019-02-25
Supplement: TPJ-98-301-s010.pdf [file TPJ-98-301-s010.pdf]

Table S7. XHMM output and their visual inspection results

| SAMPLE   | CNV | INTERVAL                | KB      | CHR   | MID BP   | TARGETS        | NUM_TAR | Q_EXACT | Q_SOME | Q_NON DI | Q_START | Q_STOP | MEAN RD | MEAN OR | Judgement |
|----------|-----|-------------------------|---------|-------|----------|----------------|---------|---------|--------|----------|---------|--------|---------|---------|-----------|
| 13C3-43  | DEL | chr05:14409311-14419812 | 10.5    | chr05 | 14414561 | 52071..52080   | 10      | 21      | 97     | 99       | 21      | 12     | -5.62   | 33.03   | Absent    |
| 13C3-50  | DUP | chr07:22651231-22696635 | 45.41   | chr07 | 22673933 | 69818..69855   | 38      | 3       | 99     | 99       | 4       | 3      | 3.31    | 71.68   | Absent    |
| 13C3-51  | DEL | chr08:12797847-12798366 | 0.52    | chr08 | 12798106 | 75373..75374   | 2       | 16      | 30     | 30       | 14      | 15     | -5.87   | 185.97  | Absent    |
| 13C3-55  | DEL | chr04:1977055-4547310   | 2570.26 | chr04 | 3262182  | 40302..40501   | 200     | 1       | 99     | 99       | 11      | 17     | -2.06   | 37.05   | Absent    |
| 13C3-55  | DEL | chr04:4674698-4876720   | 202.02  | chr04 | 4775709  | 40508..40521   | 14      | 5       | 99     | 95       | 12      | 4      | -2.61   | 49.36   | Absent    |
| 13C3-57  | DEL | chr06:10345044-10451010 | 105.97  | chr06 | 10398027 | 60373..60404   | 32      | 18      | 98     | 99       | 6       | 6      | -2.44   | 43.06   | Absent    |
| 13C3-58  | DEL | chr04:17492480-18098118 | 605.64  | chr04 | 17795299 | 41848..41891   | 44      | 6       | 98     | 99       | 28      | 4      | -7.33   | 20.05   | Absent    |
| 13C3-58  | DEL | chr12:15473909-16198117 | 724.21  | chr12 | 15836013 | 98669..98707   | 39      | 21      | 99     | 99       | 27      | 6      | -3.27   | 39.49   | Absent    |
| 13C3-61  | DUP | chr07:11162465-11162783 | 0.32    | chr07 | 11162624 | 67513..67514   | 2       | 5       | 31     | 31       | 5       | 30     | 5.92    | 167.71  | Absent    |
| 13C3-62  | DEL | chr06:22024348-22139206 | 114.86  | chr06 | 22081777 | 62118..62158   | 41      | 4       | 98     | 99       | 8       | 4      | -4.31   | 47.7    | Absent    |
| 13C3-64  | DUP | chr12:20541779-20542019 | 0.24    | chr12 | 20541899 | 99257..99257   | 1       | 31      | 31     | 31       | 17      | 31     | 10      | 458.76  | Absent    |
| 13C3-69  | DEL | chr07:23620977-23627654 | 6.68    | chr07 | 23624315 | 70217..70227   | 11      | 43      | 99     | 99       | 9       | 37     | -5.16   | 30.66   | Absent    |
| 13C3-71  | DUP | chr11:5422223-5422589   | 0.37    | chr11 | 5422406  | 91632..91633   | 2       | 45      | 45     | 45       | 16      | 22     | 6.59    | 93.2    | Absent    |
| 13C3-72  | DEL | chr10:6404480-7677308   | 1272.83 | chr10 | 7040894  | 85535..85686   | 152     | 4       | 99     | 99       | 8       | 5      | -2.44   | 33.72   | Absent    |
| 13C3-74  | DEL | chr09:4105238-4429927   | 324.69  | chr09 | 4267582  | 79798..79837   | 40      | 25      | 99     | 99       | 29      | 7      | -2.44   | 41.29   | Absent    |
| 13C3-74  | DUP | chr12:1557212-1558158   | 0.95    | chr12 | 1557685  | 96208..96212   | 5       | 16      | 33     | 33       | 31      | 15     | 3.41    | 123.83  | Absent    |
| 13C3-75  | DUP | chr08:28293689-28349984 | 56.3    | chr08 | 28321836 | 79152..79173   | 22      | 6       | 73     | 73       | 7       | 5      | 2.12    | 66.01   | Absent    |
| 13C3-75  | DUP | chr08:28370572-28408839 | 38.27   | chr08 | 28389705 | 79180..79210   | 31      | 9       | 99     | 99       | 5       | 9      | 2.18    | 59.12   | Absent    |
| 13C3-78  | DEL | chr12:20541779-20542019 | 0.24    | chr12 | 20541899 | 99257..99257   | 1       | 31      | 31     | 31       | 30      | 31     | -10     | 401.82  | Absent    |
| 13C3-81  | DEL | chr10:21369911-21570481 | 200.57  | chr10 | 21470196 | 88918..89013   | 96      | 4       | 99     | 99       | 18      | 4      | -3.82   | 39.1    | Absent    |
| 13C3-82  | DUP | chr08:12797847-12798366 | 0.52    | chr08 | 12798106 | 75373..75374   | 2       | 17      | 40     | 40       | 25      | 12     | 6.25    | 255.7   | Absent    |
| 13C3-82  | DUP | chr12:20308195-20542019 | 233.82  | chr12 | 20425107 | 99256..99257   | 2       | 5       | 34     | 34       | 5       | 27     | 6.39    | 322.34  | Absent    |
| 13C3-83  | DUP | chr08:12797847-12798366 | 0.52    | chr08 | 12798106 | 75373..75374   | 2       | 22      | 45     | 45       | 19      | 22     | 6.44    | 278.02  | Absent    |
| 13C3-83  | DUP | chr12:20541779-20542019 | 0.24    | chr12 | 20541899 | 99257..99257   | 1       | 31      | 31     | 31       | 8       | 31     | 10      | 504.15  | Absent    |
| 13C3-84  | DEL | chr01:11813967-12131075 | 317.11  | chr01 | 11972521 | 4203..4242     | 40      | 13      | 99     | 99       | 17      | 15     | -5      | 21.19   | Absent    |
| 13C3-84  | DEL | chr04:17180496-18216312 | 1035.82 | chr04 | 17698404 | 41835..41910   | 76      | 27      | 98     | 99       | 7       | 33     | -4.84   | 25.3    | Absent    |
| 13C3-85  | DEL | chr01:35505764-35518982 | 13.22   | chr01 | 35512373 | 11166..11174   | 9       | 30      | 99     | 99       | 6       | 14     | -3.17   | 49.5    | Absent    |
| 13C3-88  | DUP | chr08:12797847-12798366 | 0.52    | chr08 | 12798106 | 75373..75374   | 2       | 7       | 30     | 30       | 22      | 7      | 5.85    | 241.4   | Absent    |
| 13C3-89  | DEL | chr07:2940527-2943668   | 3.14    | chr07 | 2942097  | 65814..65816   | 3       | 24      | 31     | 31       | 27      | 14     | -4.59   | 78.69   | Absent    |
| 13C3-97  | DEL | chr07:20562504-20705484 | 142.98  | chr07 | 20633994 | 69247..69263   | 17      | 50      | 99     | 99       | 26      | 19     | -5.65   | 20.84   | Absent    |
| 13C3-97  | DEL | chr10:15454918-15622656 | 167.74  | chr10 | 15538787 | 86956..86965   | 10      | 17      | 99     | 99       | 17      | 21     | -3.69   | 22.11   | Absent    |
| 13C3-99  | DEL | chr09:22927705-22938737 | 11.03   | chr09 | 22933221 | 84625..84635   | 11      | 5       | 80     | 80       | 27      | 5      | -2.66   | 84.46   | Absent    |
| 13C3-101 | DUP | chr05:29139220-29141755 | 2.54    | chr05 | 29140487 | 56764..56769   | 6       | 4       | 34     | 34       | 13      | 4      | 3.07    | 82.61   | Absent    |
| 13C3-103 | DEL | chr01:37891680-37896511 | 4.83    | chr01 | 37894095 | 12137..12140   | 4       | 7       | 31     | 31       | 7       | 23     | -3.77   | 41.97   | Absent    |
| 13C3-103 | DEL | chr07:16013069-16031584 | 18.52   | chr07 | 16022326 | 68215..68228   | 14      | 3       | 99     | 99       | 23      | 3      | -2.65   | 46.94   | Absent    |
| 13C3-104 | DEL | chr09:16738267-17083380 | 345.11  | chr09 | 16910823 | 81973..82087   | 115     | 21      | 99     | 99       | 2       | 10     | -2.92   | 35.47   | Absent    |
| 13C3-104 | DUP | chr12:20308195-20542019 | 233.82  | chr12 | 20425107 | 99256..99257   | 2       | 29      | 60     | 60       | 23      | 22     | 7.45    | 274.75  | Absent    |
| 13C3-106 | DEL | chr01:4765469-4766402   | 0.93    | chr01 | 4765935  | 2051..2053     | 3       | 29      | 58     | 58       | 24      | 10     | -5.23   | 76.33   | Absent    |
| 13C3-107 | DEL | chr01:19302590-19476739 | 174.15  | chr01 | 19389664 | 5526..5571     | 46      | 17      | 99     | 99       | 4       | 6      | -2.33   | 53.58   | Absent    |
| 13C3-114 | DEL | chr01:4848955-4854197   | 5.24    | chr01 | 4851576  | 2083..2089     | 7       | 54      | 99     | 99       | 3       | 42     | -5.6    | 41.63   | Absent    |
| 13C3-114 | DEL | chr12:23765317-23992564 | 227.25  | chr12 | 23878940 | 100033..100141 | 109     | 4       | 99     | 99       | 4       | 15     | -3.73   | 38.83   | Absent    |
| 13C3-115 | DEL | chr12:11716349-11743423 | 27.07   | chr12 | 11729886 | 98302..98317   | 16      | 5       | 99     | 99       | 5       | 27     | -3.25   | 41      | Absent    |
| 13C3-116 | DEL | chr07:10498473-10500825 | 2.35    | chr07 | 10499649 | 67442..67444   | 3       | 48      | 61     | 61       | 24      | 28     | -5.16   | 24.74   | Absent    |
| 13C3-116 | DEL | chr08:12797847-12798366 | 0.52    | chr08 | 12798106 | 75373..75374   | 2       | 19      | 41     | 41       | 15      | 18     | -6.29   | 167.47  | Absent    |
| 13C3-116 | DEL | chr12:20541779-20542019 | 0.24    | chr12 | 20541899 | 99257..99257   | 1       | 32      | 32     | 32       | 6       | 29     | -10     | 364.32  | Absent    |
| 13C3-117 | DUP | chr08:752397-758308     | 5.91    | chr08 | 755352   | 73012..73016   | 5       | 11      | 54     | 54       | 11      | 19     | 3.71    | 106.16  | Absent    |
| 13C3-117 | DEL | chr12:20541779-20542019 | 0.24    | chr12 | 20541899 | 99257..99257   | 1       | 32      | 32     | 32       | 5       | 29     | -10     | 363.91  | Absent    |
| 13C3-118 | DUP | chr08:12731867-12798366 | 66.5    | chr08 | 12765116 | 75372..75374   | 3       | 4       | 37     | 37       | 4       | 9      | 4.65    | 182.71  | Absent    |

|          |     |                         |        |       |                       |    |    |    |    |    |    |       |        |        |
|----------|-----|-------------------------|--------|-------|-----------------------|----|----|----|----|----|----|-------|--------|--------|
| 13C3-118 | DUP | chr12:20308195-20542019 | 233.82 | chr12 | 20425107 99256..99257 | 2  | 23 | 53 | 53 | 12 | 40 | 7.2   | 357.63 | Absent |
| 13C3-119 | DEL | chr02:32688927-32704634 | 15.71  | chr02 | 32696780 24948..24959 | 12 | 10 | 99 | 99 | 10 | 4  | -5.15 | 34.87  | Absent |
| 13C3-120 | DEL | chr01:14294181-14511227 | 217.05 | chr01 | 14402704 4641..4701   | 61 | 6  | 99 | 99 | 4  | 3  | -1.93 | 51.89  | Absent |
| 13C3-120 | DEL | chr07:18228994-18252381 | 23.39  | chr07 | 18240687 68634..68651 | 18 | 13 | 99 | 99 | 10 | 28 | -4.59 | 31.45  | Absent |
| 13C3-120 | DEL | chr09:22563953-22623187 | 59.23  | chr09 | 22593570 84376..84404 | 29 | 5  | 99 | 99 | 11 | 4  | -6.48 | 26.14  | Absent |

---
